# Supplementary material
Source: publisher figshare collection journal article supplement (https://acs.figshare.com/ndownloader/files/6056043)
Supplement: Supplementary file 1 [file 6056043]

# Effects of Additives on Kinetics, Morphologies and Lead-Sensing Property of Electrodeposited Bismuth Films

*Athimothu Raju Rajamani,<sup>1,2</sup> Sathiskumar Jothi,<sup>3</sup> Murugaiah Dhinesh Kumar,<sup>2</sup> Srinivasan Srikanth,<sup>2</sup> Manoj Kumar Singh,<sup>4</sup> Gonzalo Otero-Irurueta,<sup>4</sup> Devaraj Ramasamy,<sup>4</sup> Madhav Datta,<sup>1,5</sup> Murali Rangarajan<sup>\*1,2</sup>*

<sup>1</sup>Center of Excellence in Advanced Materials and Green Technologies, Amrita School of Engineering Coimbatore, Amrita Vishwa Vidyapeetham, Amrita University, Coimbatore, Tamil Nadu 641112, India

<sup>2</sup>Department of Chemical Engineering and Materials Science, Amrita School of Engineering Coimbatore, Amrita Vishwa Vidyapeetham, Amrita University, Coimbatore, Tamil Nadu 641112, India

<sup>3</sup>Material Research Centre, College of Engineering, Swansea University, Bay Campus, Fabian Way, Swansea SA1 8EN, U.K.

<sup>4</sup>Centre for Mechanical Technology & Automation, Department of Mechanical Engineering, University of Aveiro, 3810-193 Aveiro, Portugal

<sup>5</sup>Amrita Center for Industrial Research and Innovation, Amrita School of Engineering Coimbatore, Amrita Vishwa Vidyapeetham, Amrita University, Coimbatore, Tamil Nadu 641112, India

# SUPPORTING INFORMATION

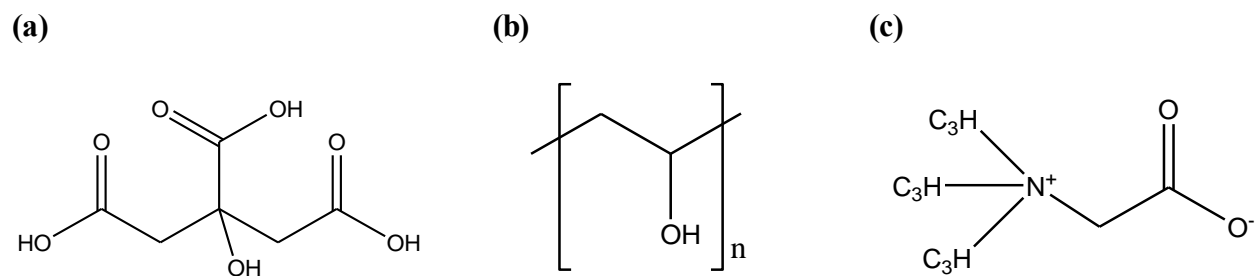

**Figure S1.** (a) Structure of Citric acid (b) Structure of Poly(vinyl alcohol) (c) Structure of Betaine

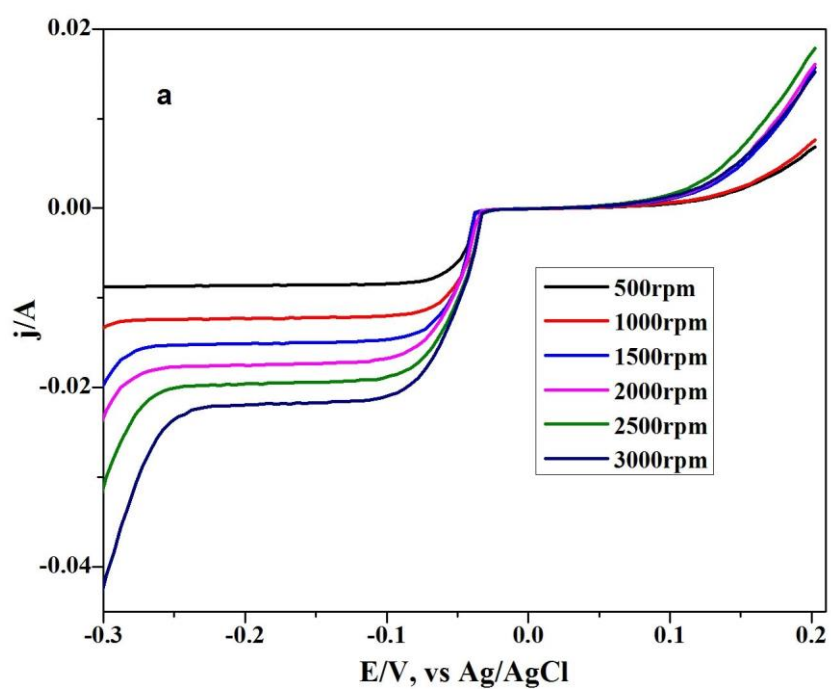

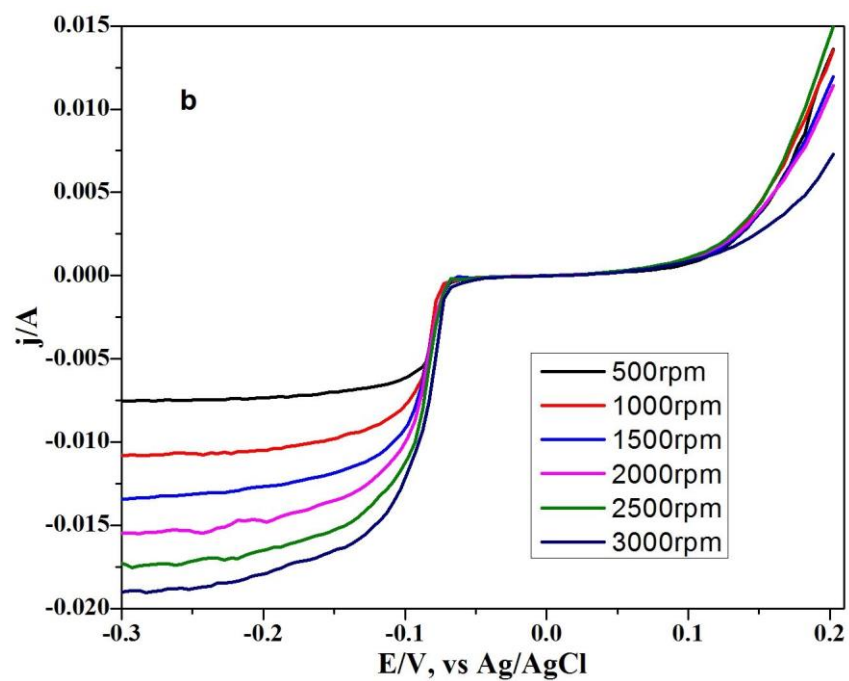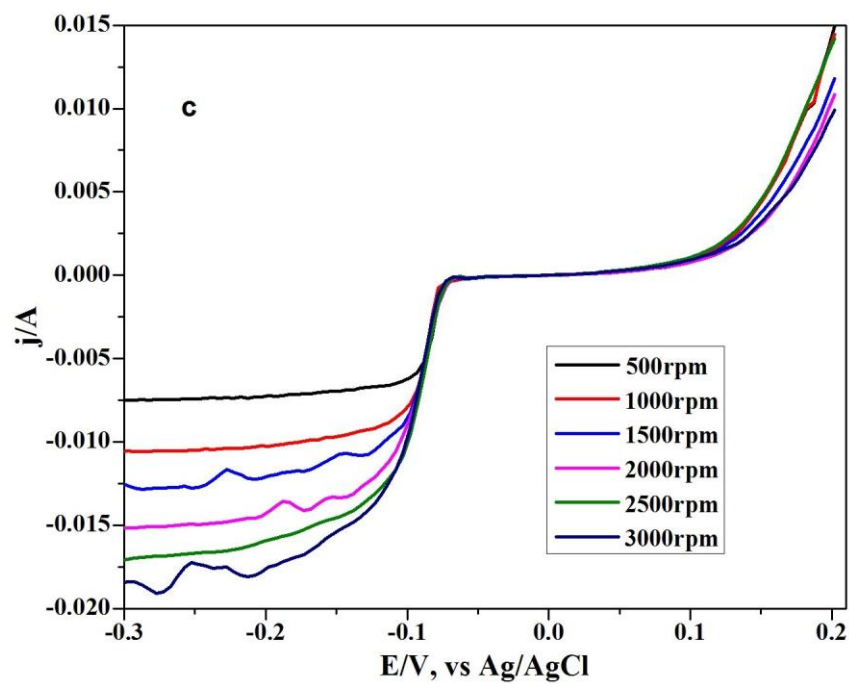

**Figure S2. (a)** Rotating disk voltammetry study of bismuth deposition from a bath containing 0.01 M  $\text{Bi}(\text{NO}_3)_3$ , 0.4 M  $\text{HNO}_3$ , and 0.1M citric acid; **(b)** 0.01 M  $\text{Bi}(\text{NO}_3)_3$ , 0.4 M  $\text{HNO}_3$ , 0.1M citric acid, and 5 gpl poly(vinyl alcohol); **(c)** 0.01 M  $\text{Bi}(\text{NO}_3)_3$ , 0.4 M  $\text{HNO}_3$ , 0.1M citric acid, 5 gpl poly(vinyl alcohol), 0.01 M betaine.

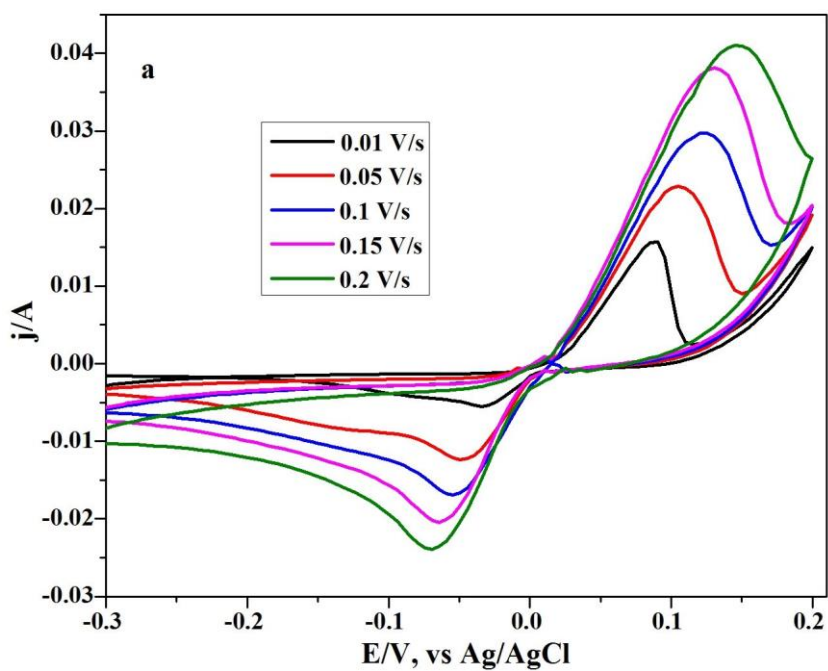

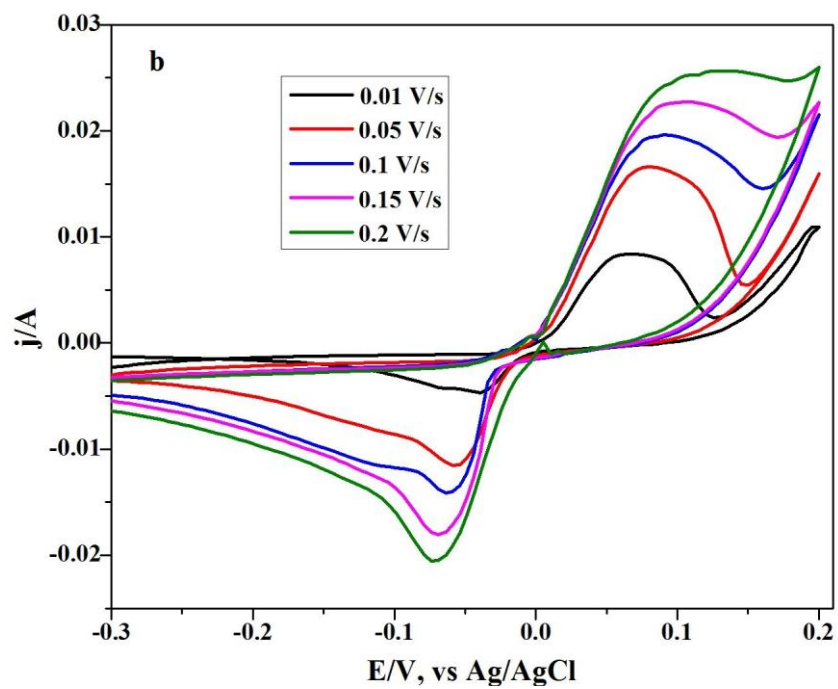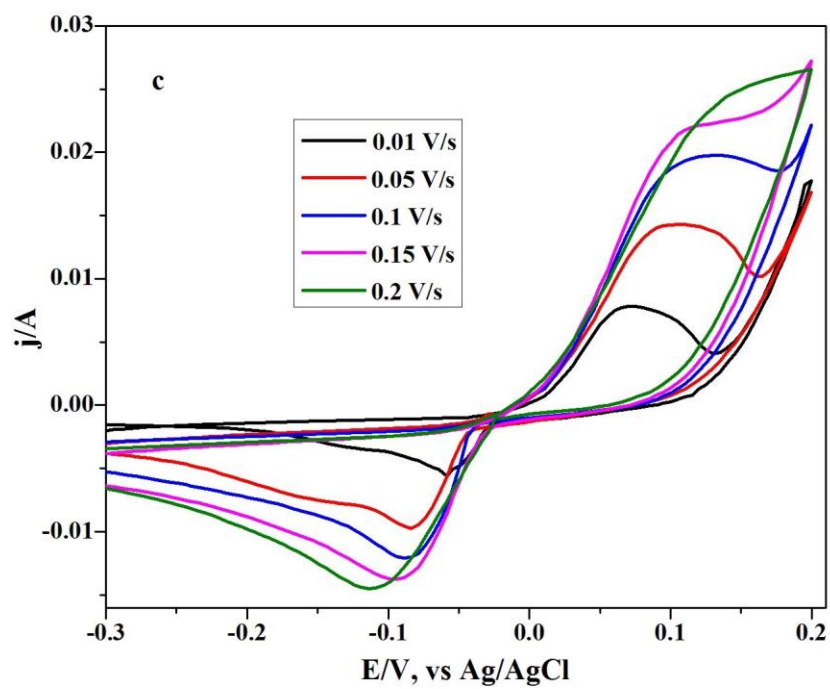

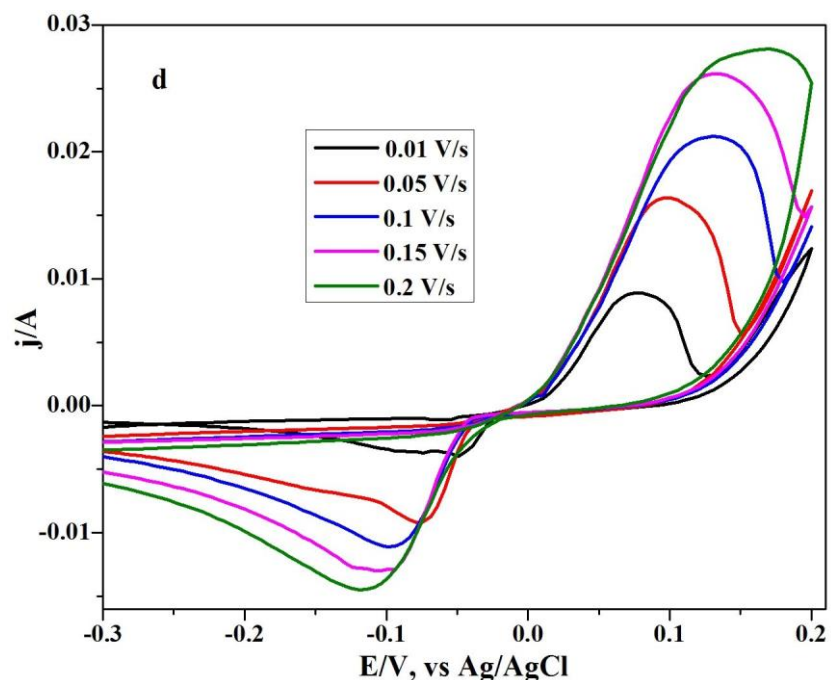

**Figure S3.** (a) Cyclic voltammetry of bismuth reduction in baths containing 0.01 M  $\text{Bi}(\text{NO}_3)_3$  and 0.4 M  $\text{HNO}_3$  at different scan rate (0.01, 0.05, 0.1, 0.15, 0.2 V); (b) with 0.1 M citric acid at different scan rate (0.01, 0.05, 0.1, 0.15, 0.2 V); (c) with 0.1 M citric acid and 5 gpl poly(vinyl alcohol) at different scan rate (0.01, 0.05, 0.1, 0.15, 0.2 V); (d) with 0.1 M citric acid, 5 gpl poly(vinyl alcohol) and 0.01 M betaine at different scan rate (0.01, 0.05, 0.1, 0.15, 0.2 V).

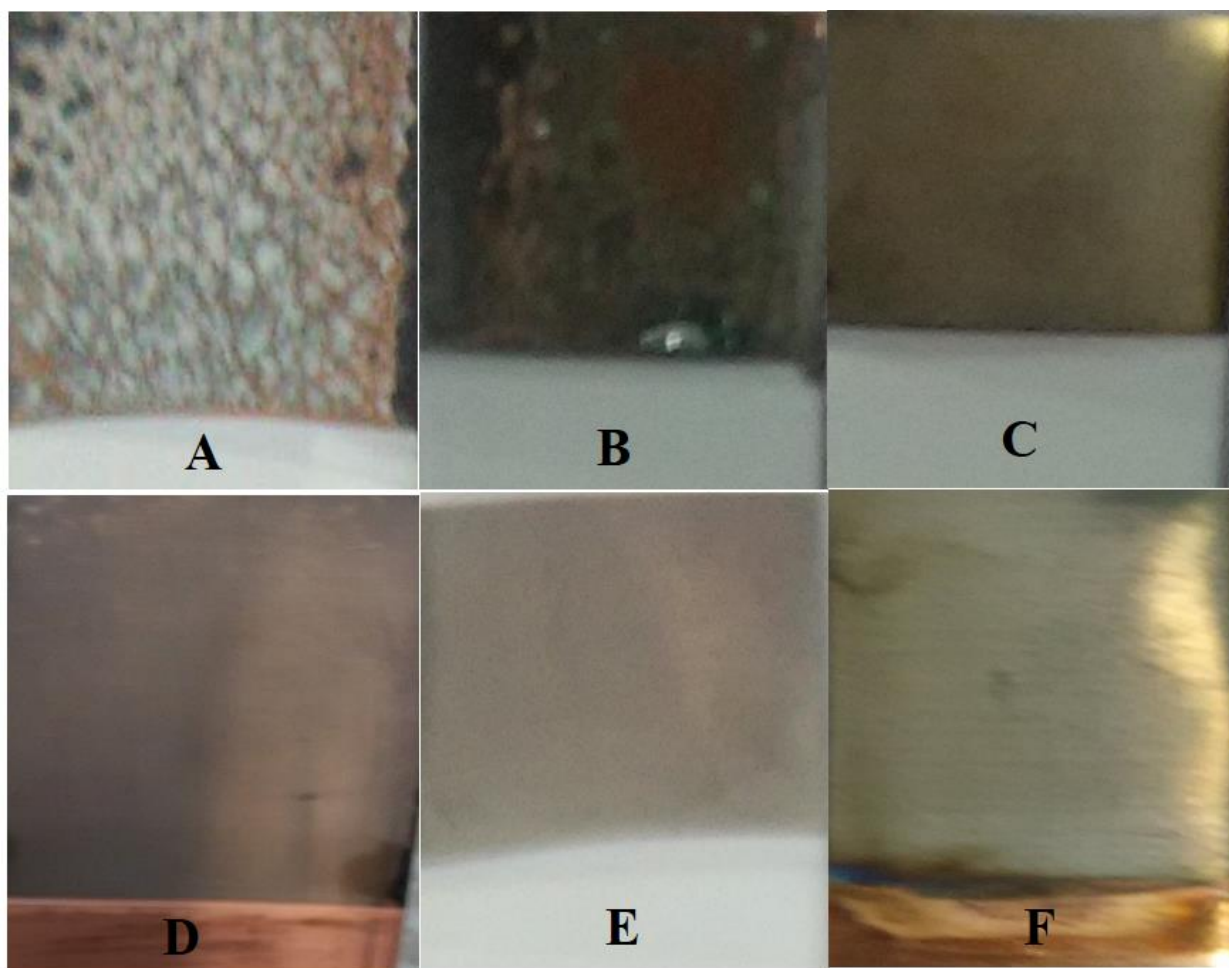

**Figure S4.** Electrodeposited samples table 1 (Samples A-F)

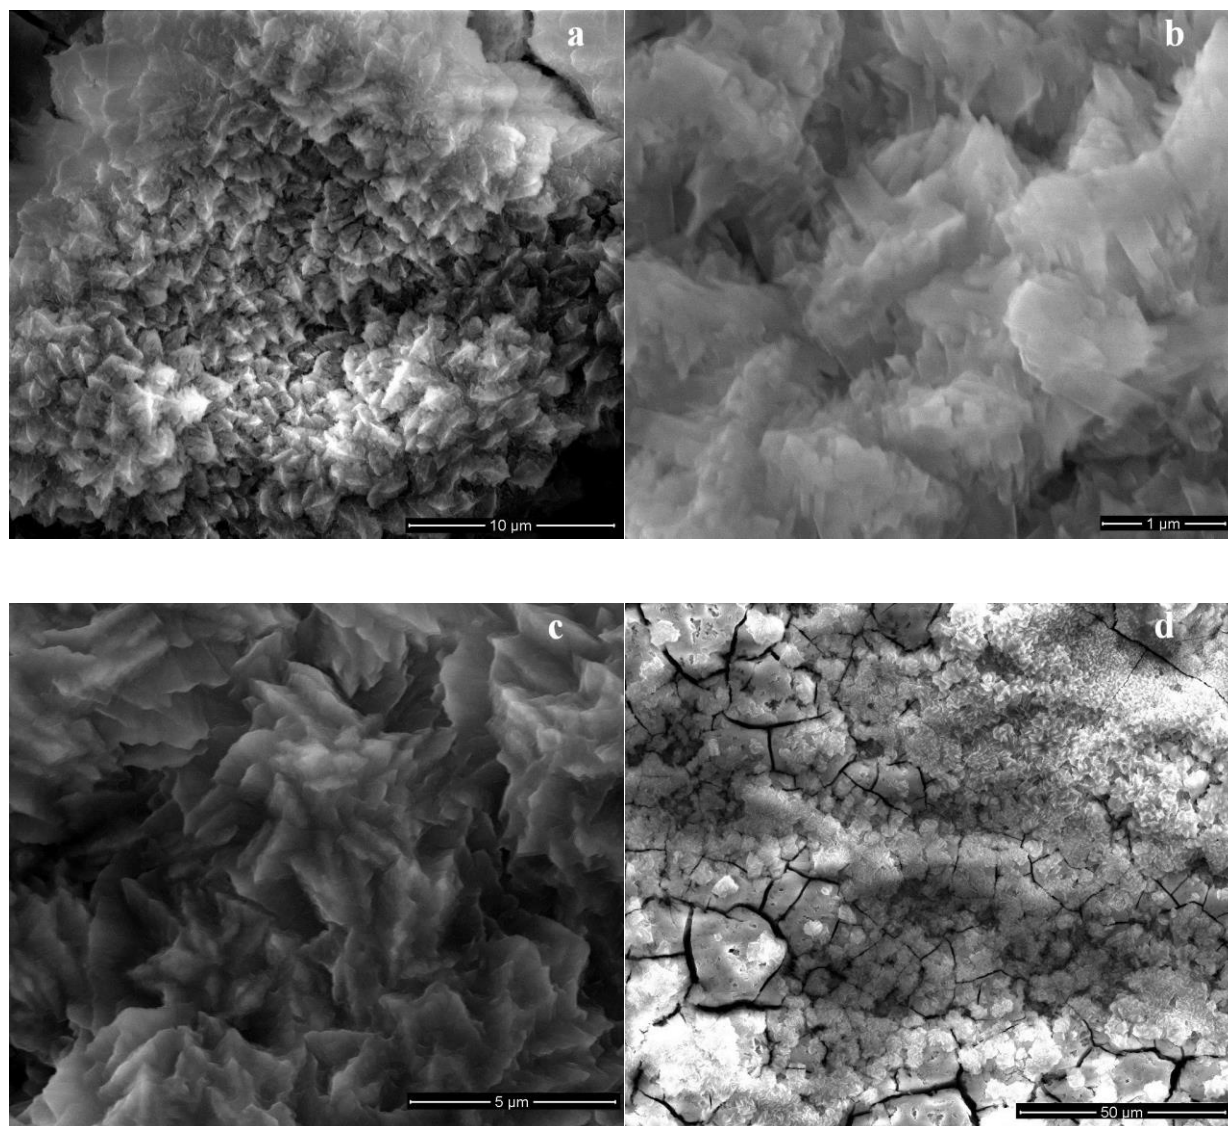

**Figure S5.** Electrodeposited bismuth with 0.1M citric acid (a&b) and 0.2 M citric acid (c&d) samples (Samples B)



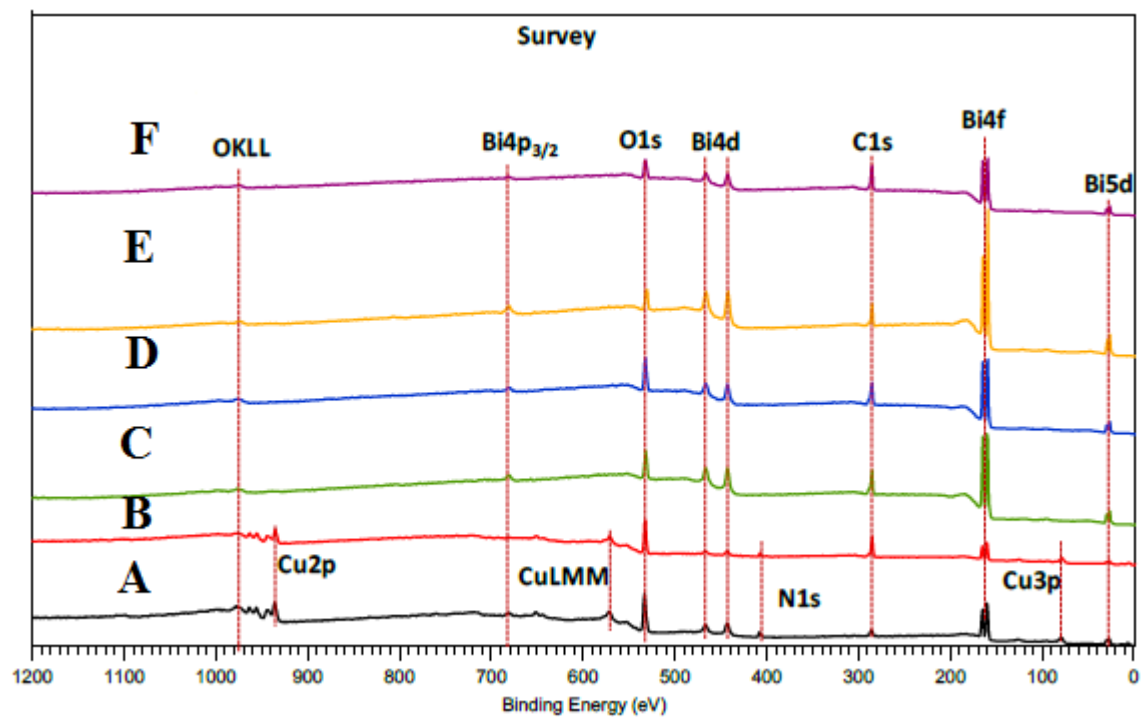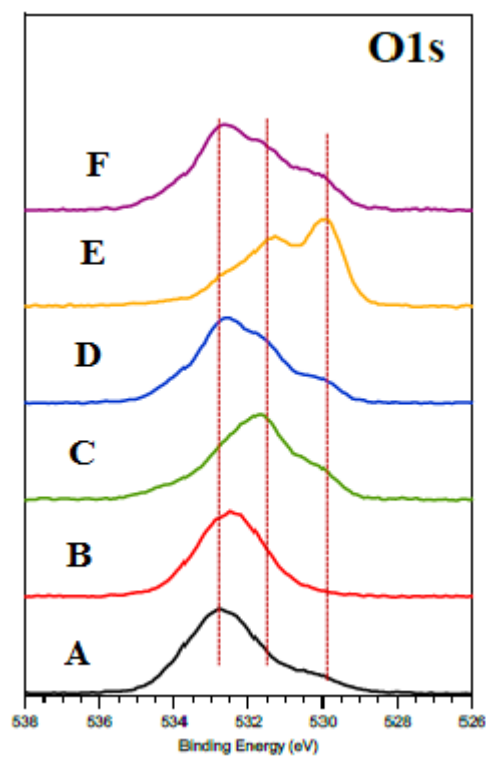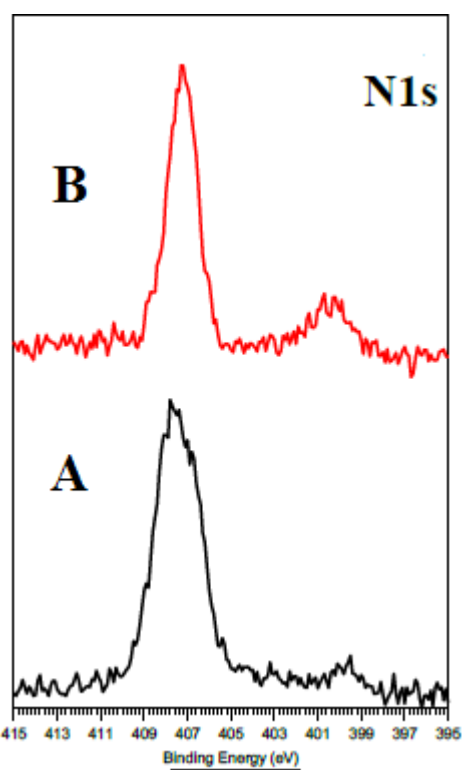

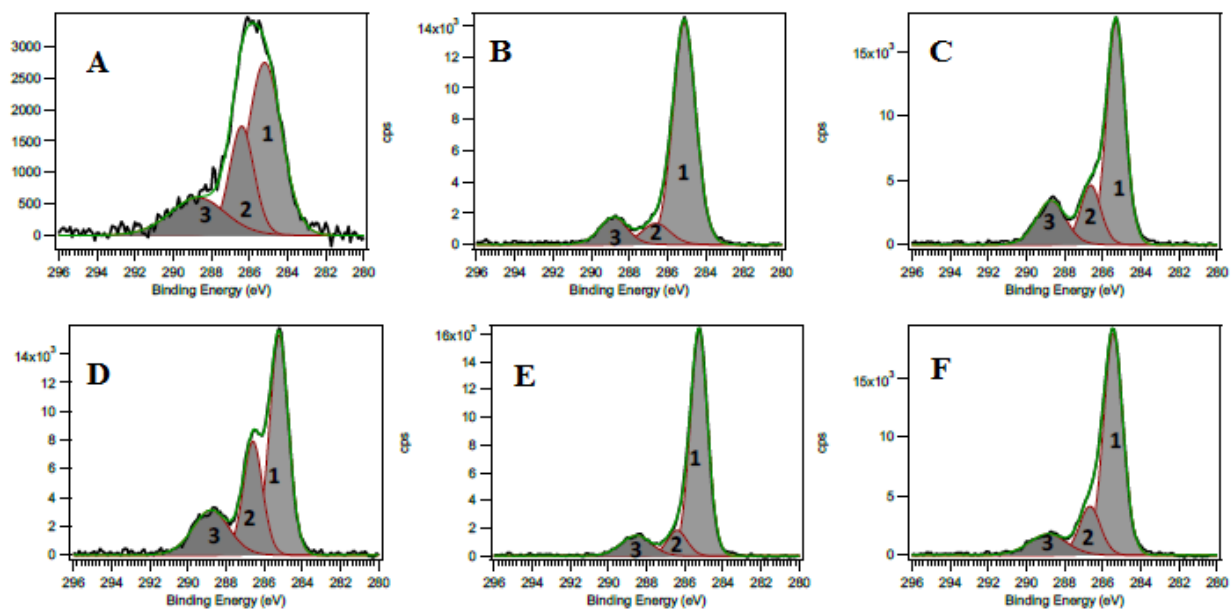

**Figure S6.** XPS spectra of electrodeposited bismuth in the absence/presence of additives (see **Table 1**). Survey scan, Oxygen, Nitrogen and carbon spectra respectively.
